# Supplementary material
Source: PubMed Central journal article supplement (PMC3225090)
Supplement: jo201952p_si_001.pdf [file jo201952p_si_001.pdf]

# A Selective Intramolecular 5-*exo*-dig or 6-*endo*-dig Cyclization en Route to 2-Furanone or 2-Pyrone Containing Tricyclic Scaffolds

Christoffer Bengtsson and Fredrik Almqvist\*

*Department of Chemistry, Umeå University, SE-901 87 Umeå, Sweden*

*fredrik.almqvist@chem.umu.se*

## Supporting information

### Table of Contents

|                                                                                                 |        |
|-------------------------------------------------------------------------------------------------|--------|
| <sup>1</sup> H-, and <sup>13</sup> C-NMR-Spectra of Compounds <b>11-13</b> , <b>15-24</b> ..... | S2-S24 |
| Reference.....                                                                                  | S25    |

Compound **9**<sup>1</sup>, **10**<sup>2</sup> and **14**<sup>3</sup> were made according to published procedures.

Compound **11** in d6-DMSO

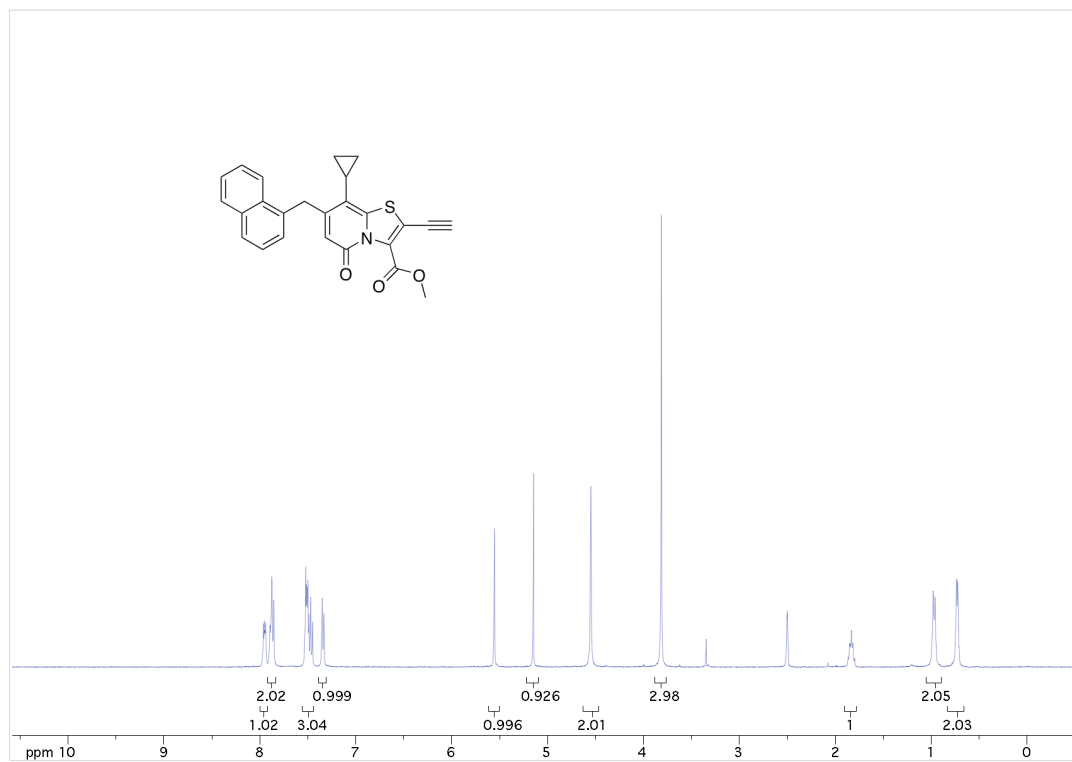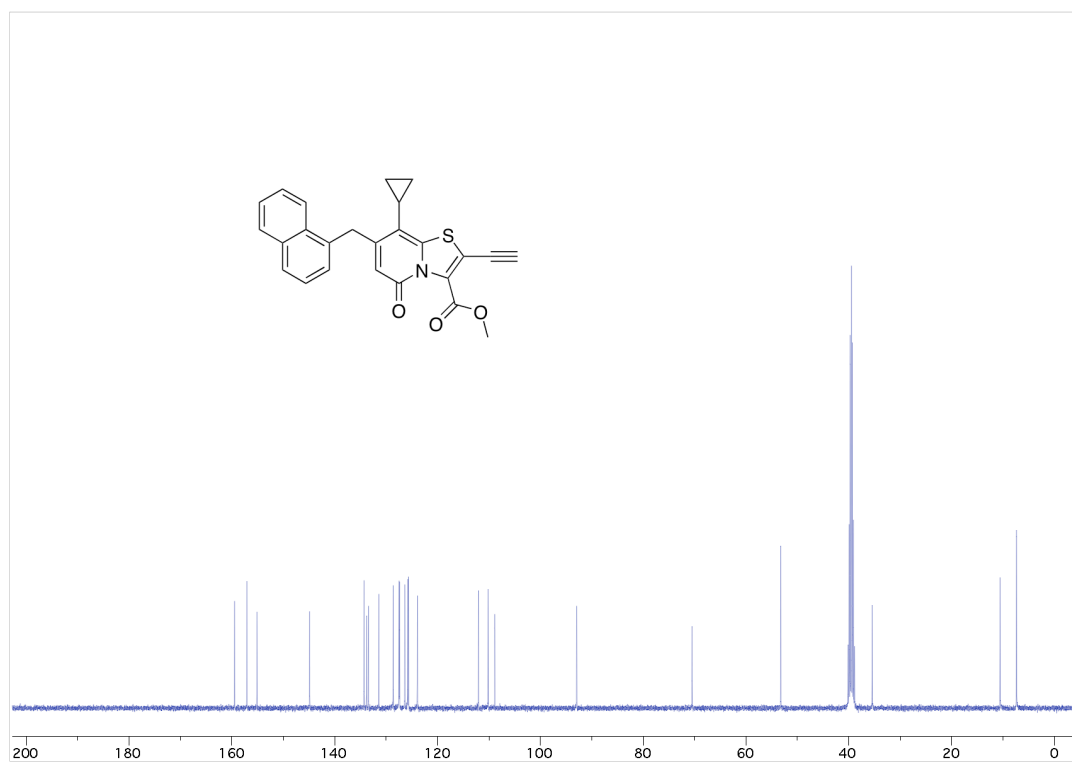

Compound **12** in CDCl<sub>3</sub>

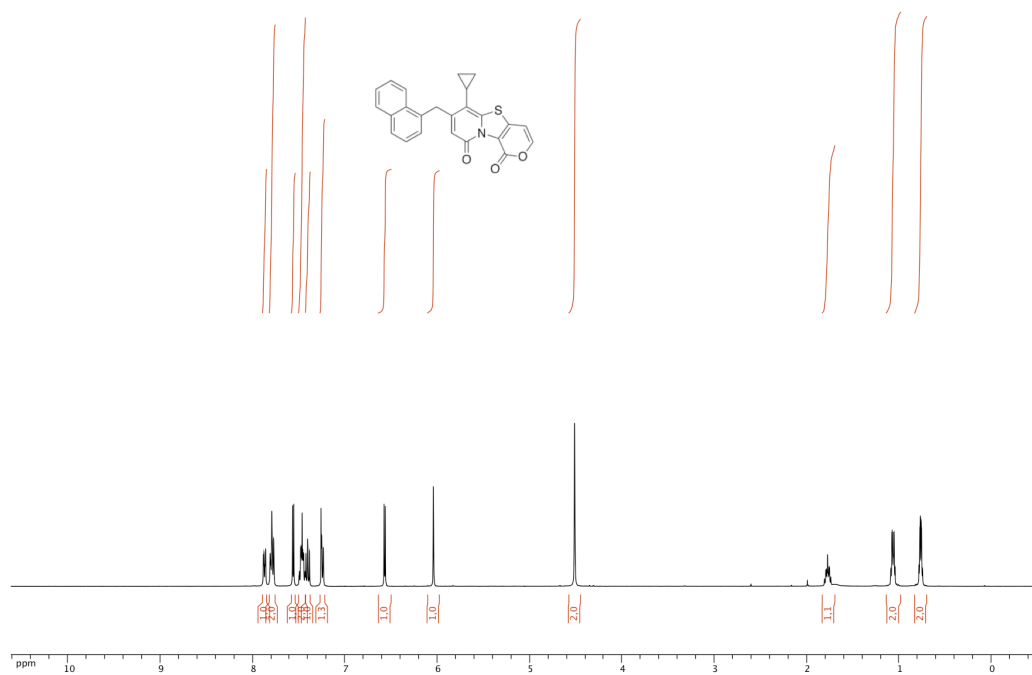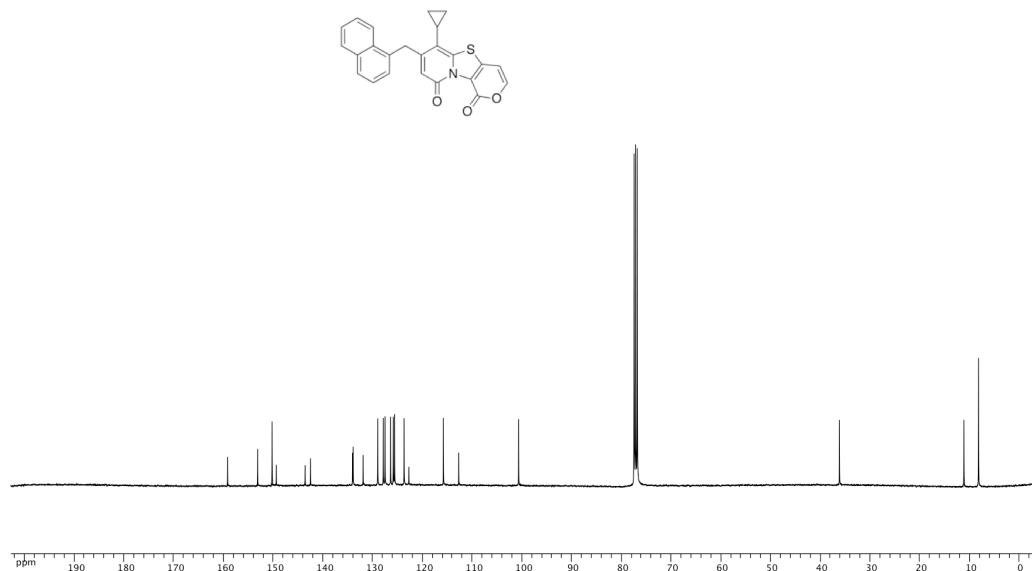

Compound **13** in CDCl<sub>3</sub>

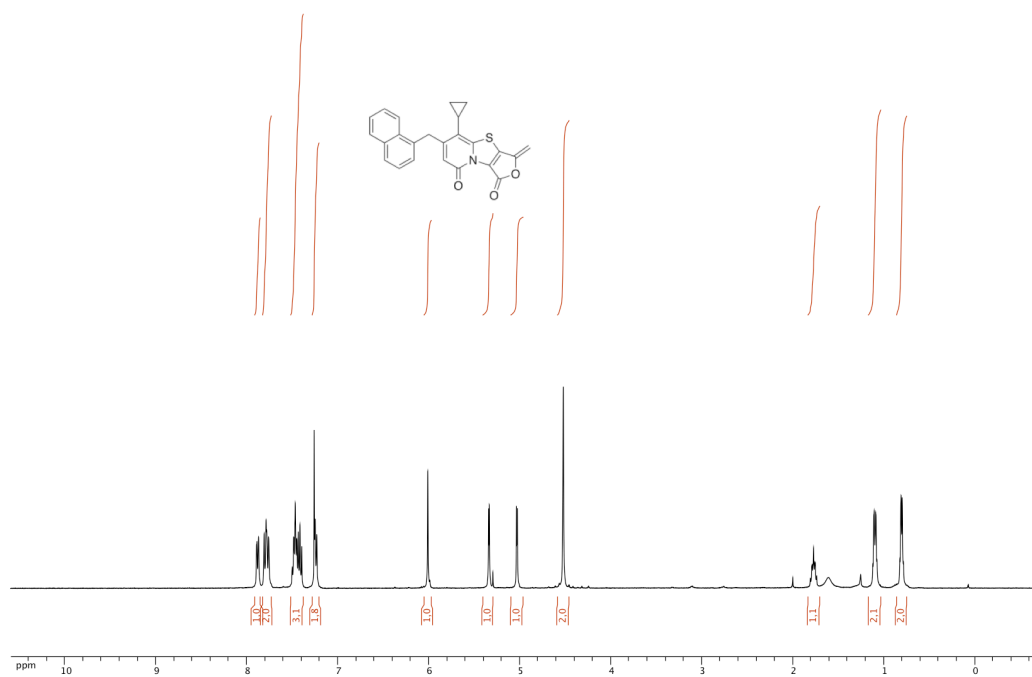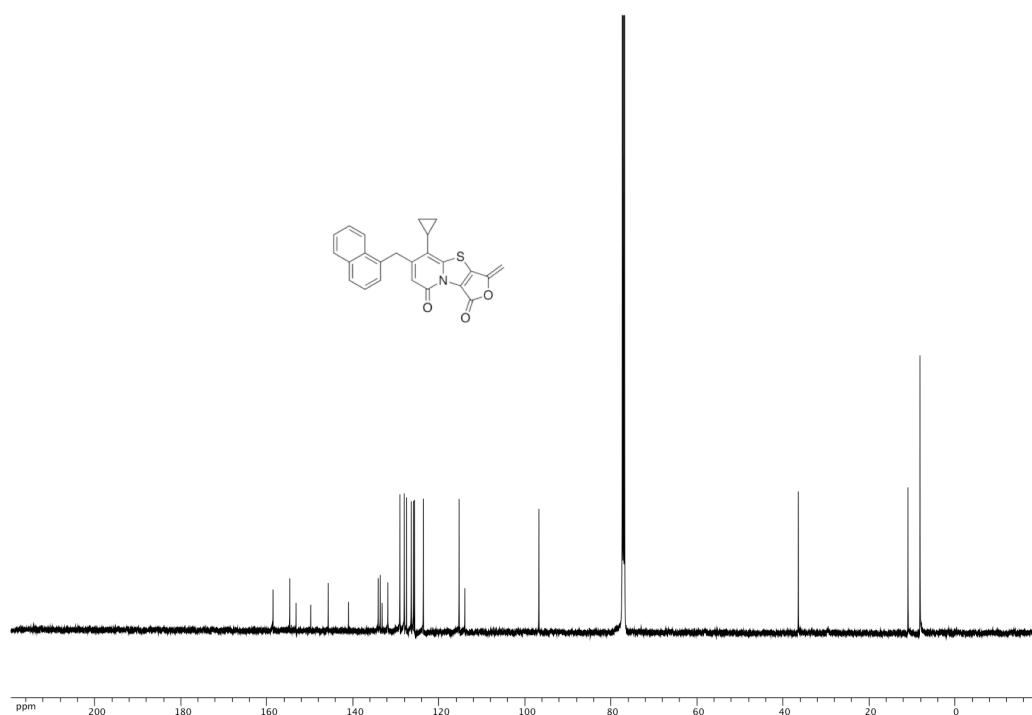

Compound **15** in CDCl<sub>3</sub>

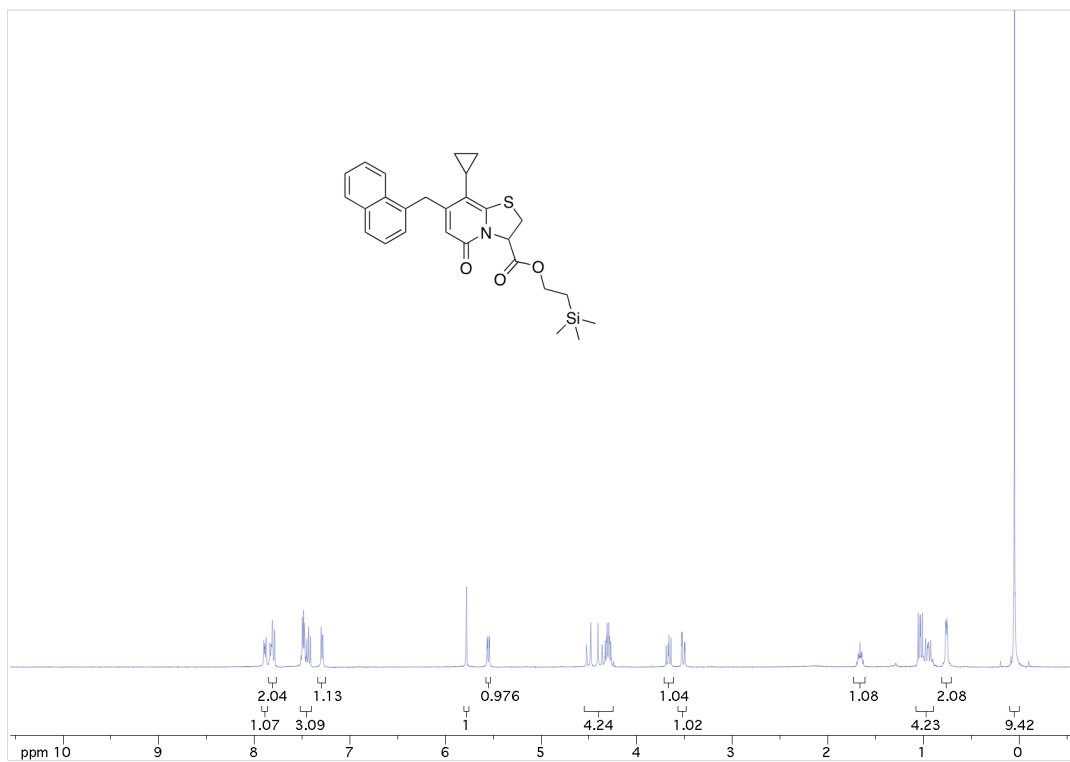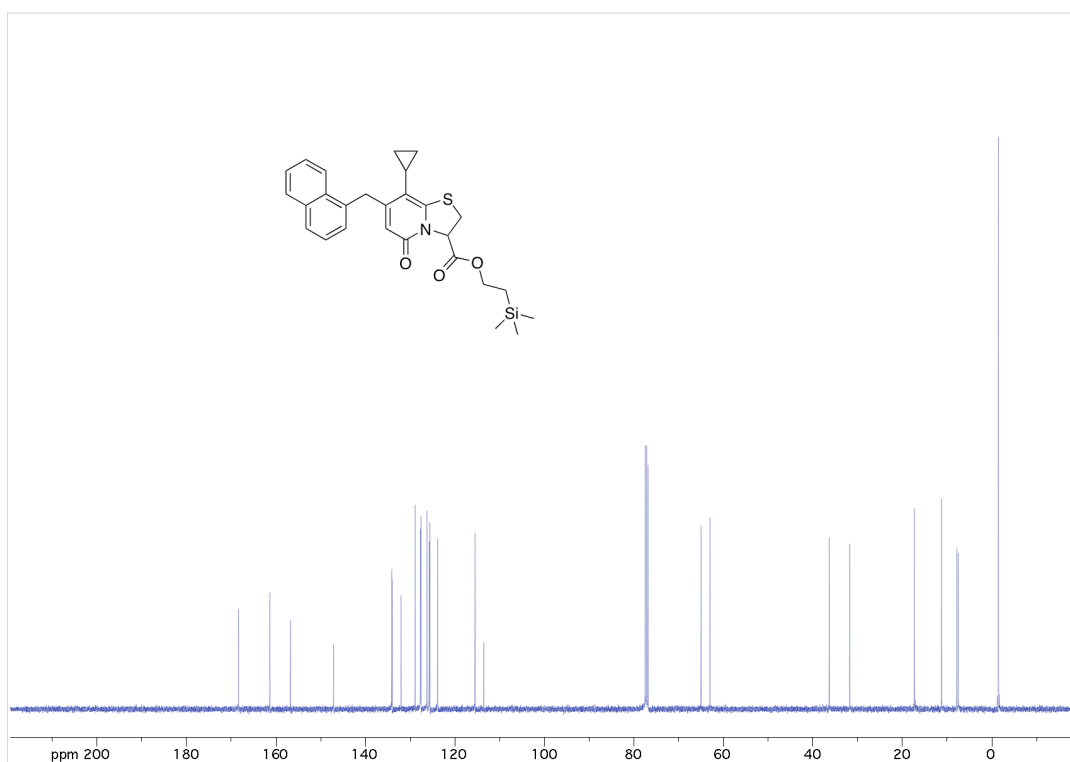

Compound **16** in CDCl<sub>3</sub>

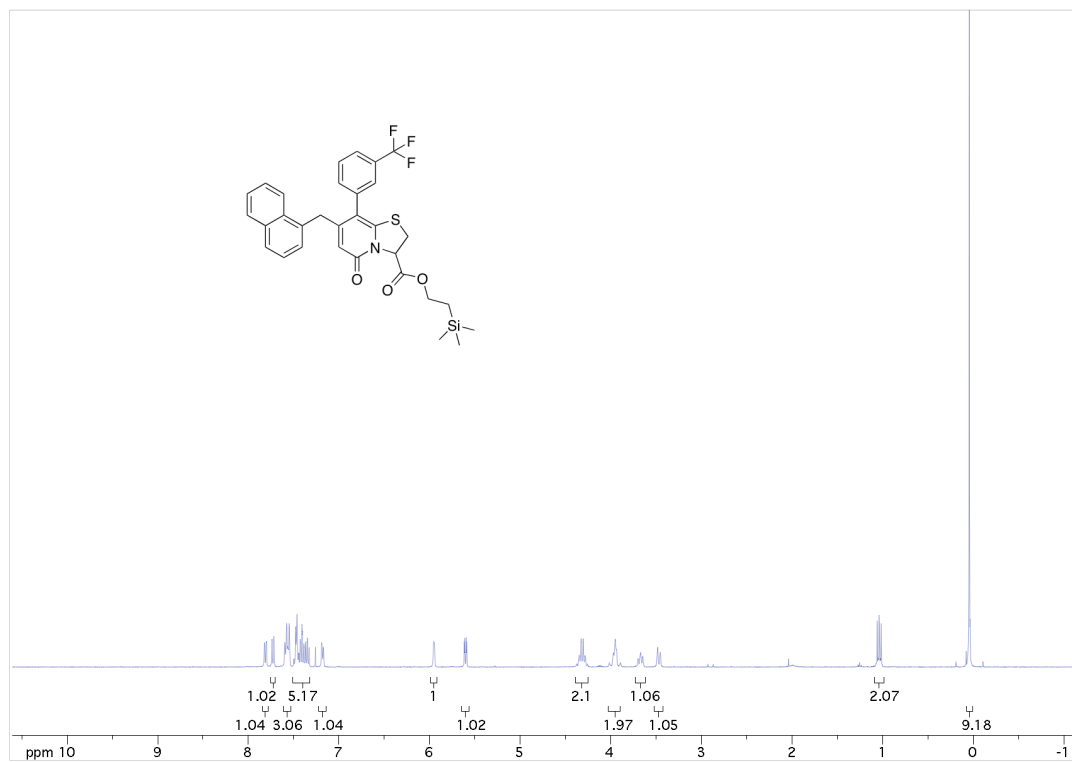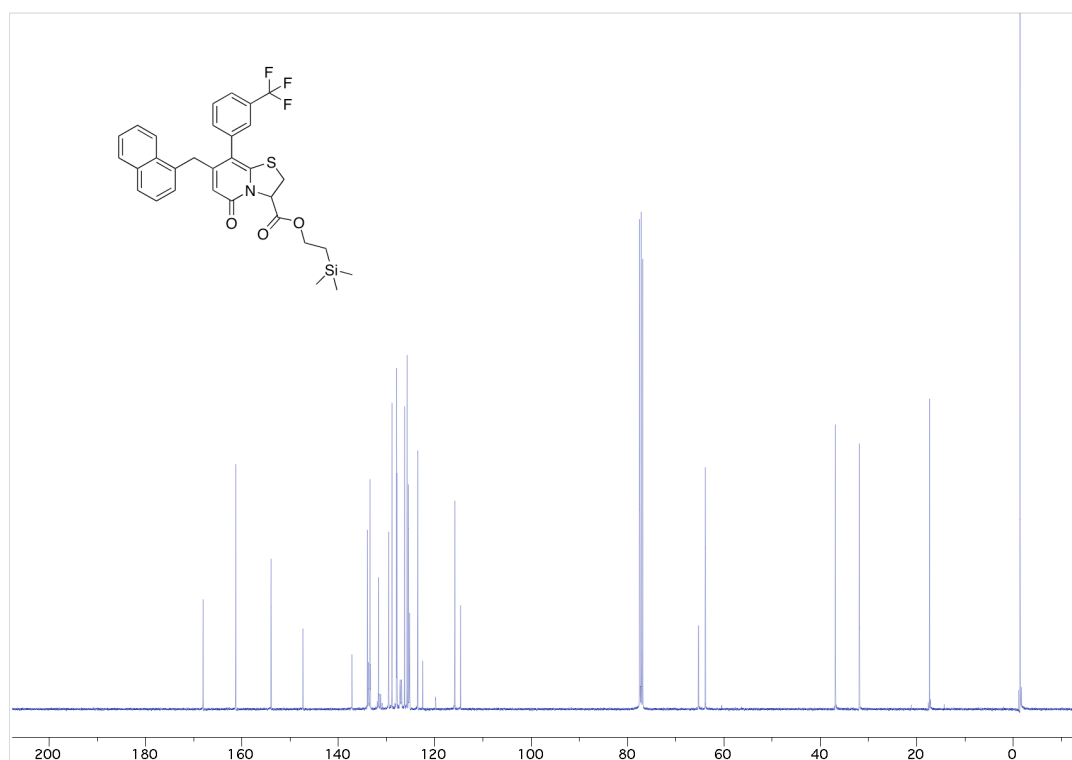

Compound **17** in CDCl<sub>3</sub>

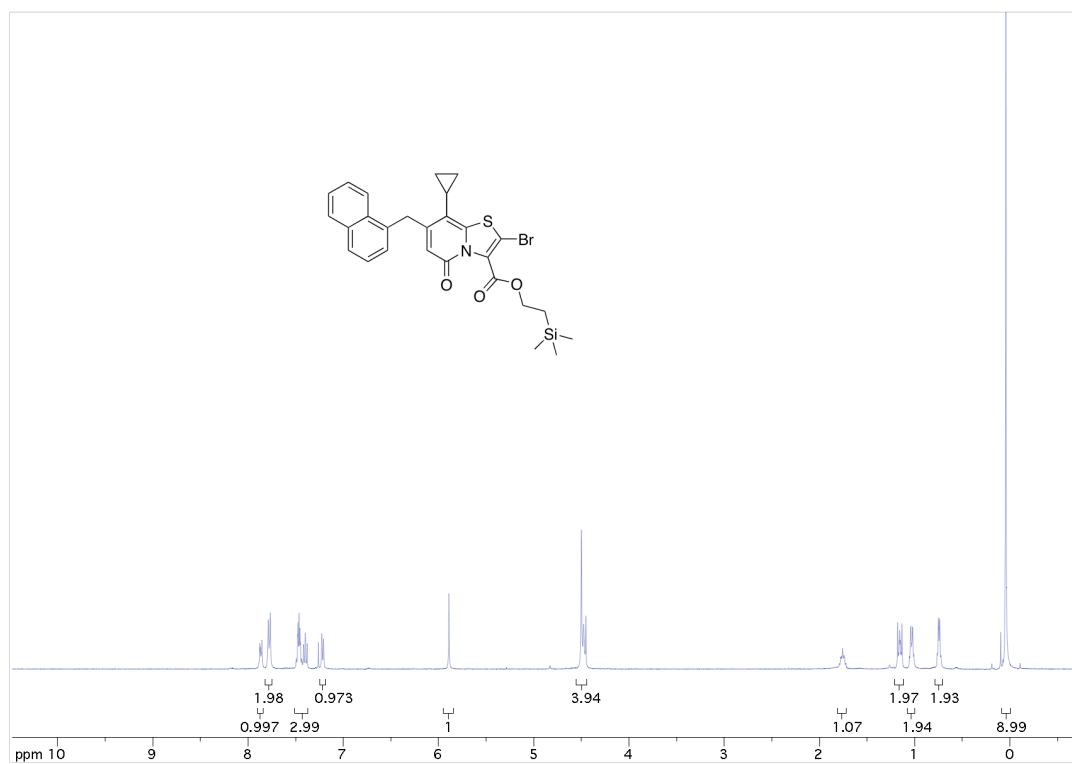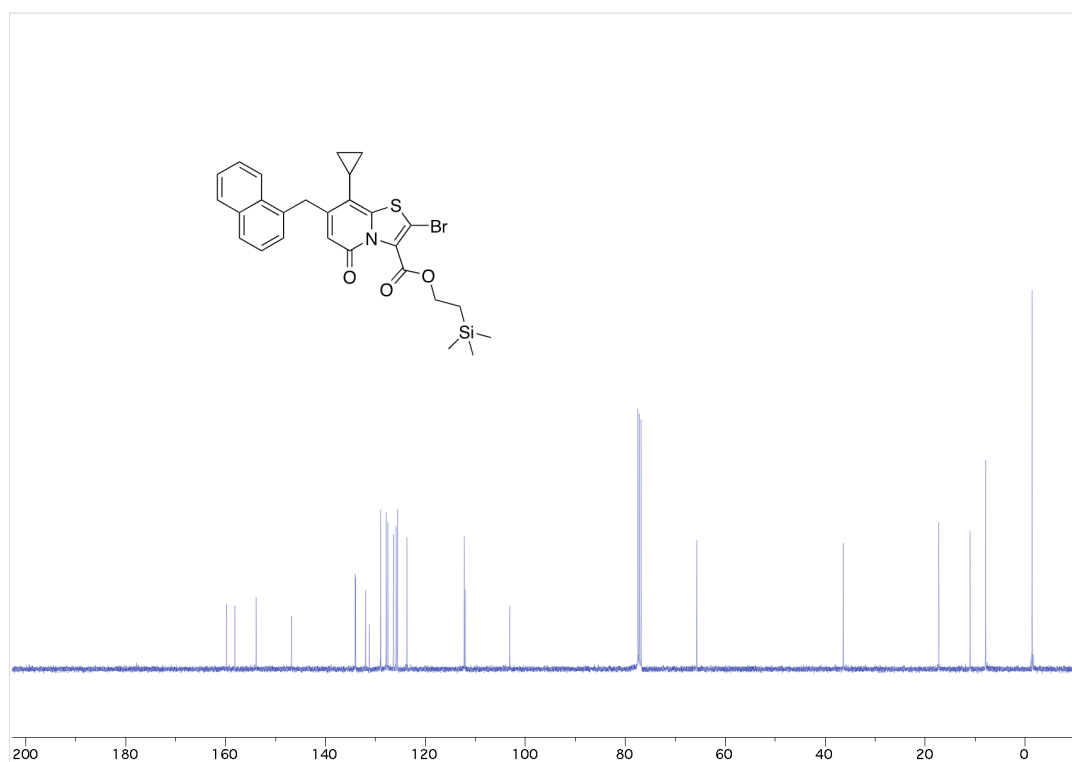

Compound **18** in CDCl<sub>3</sub>

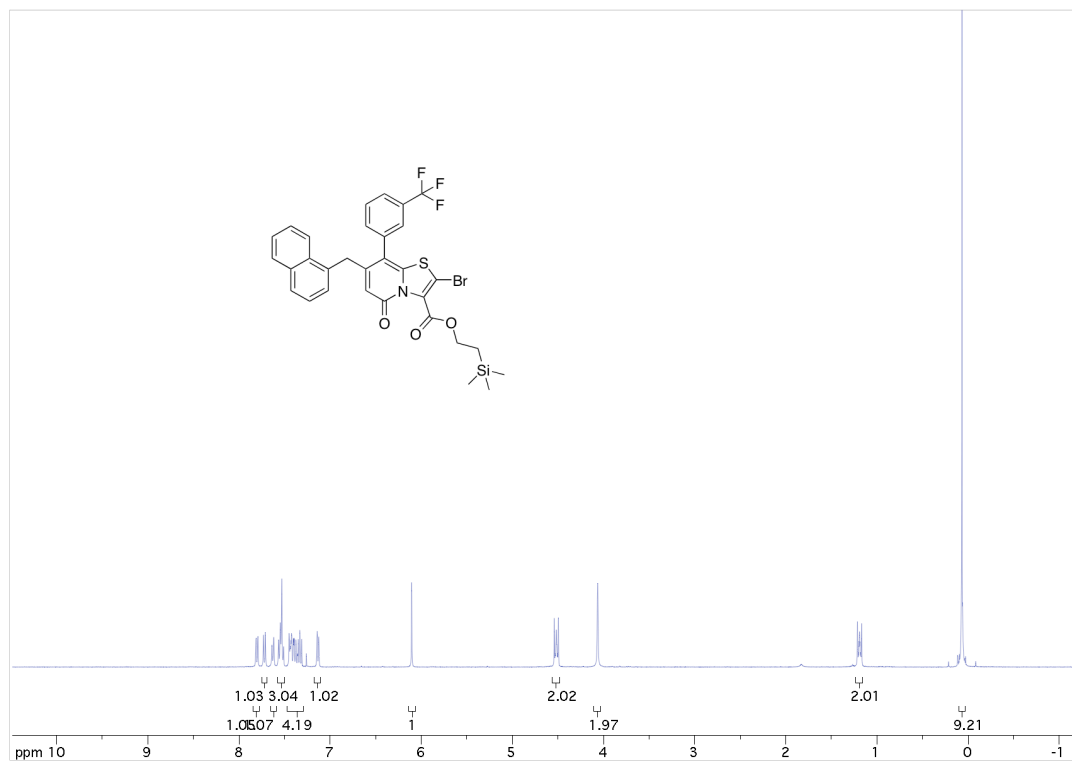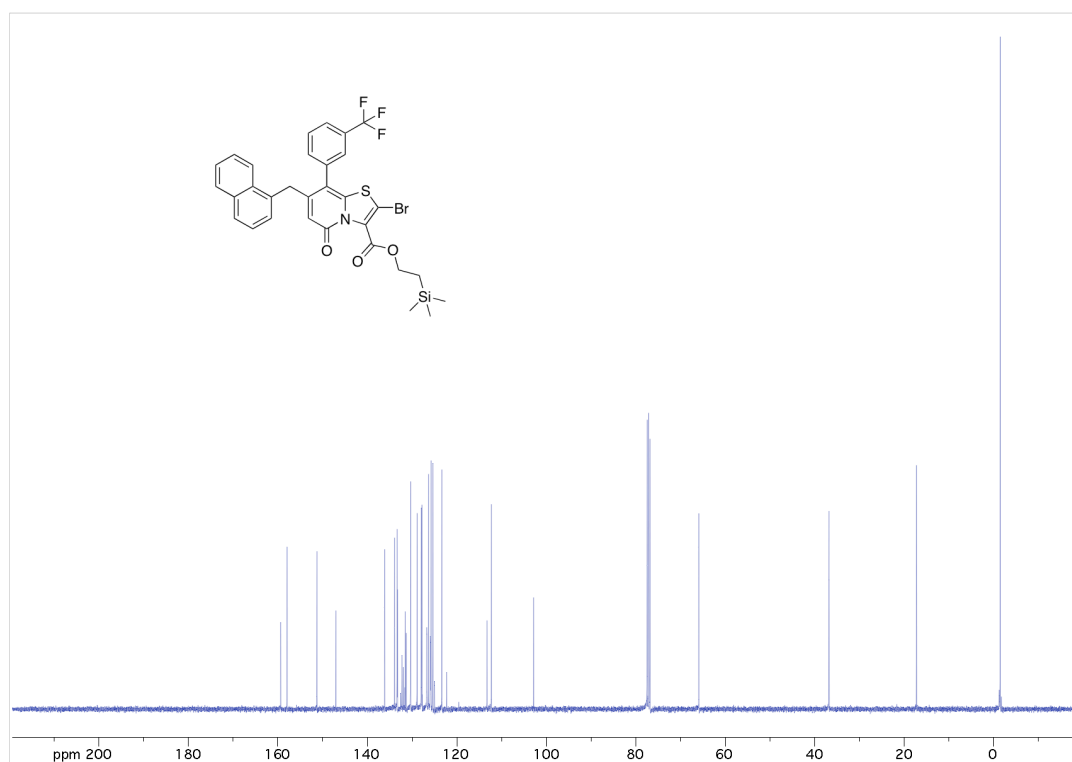



Compound **19** in d6-DMSO

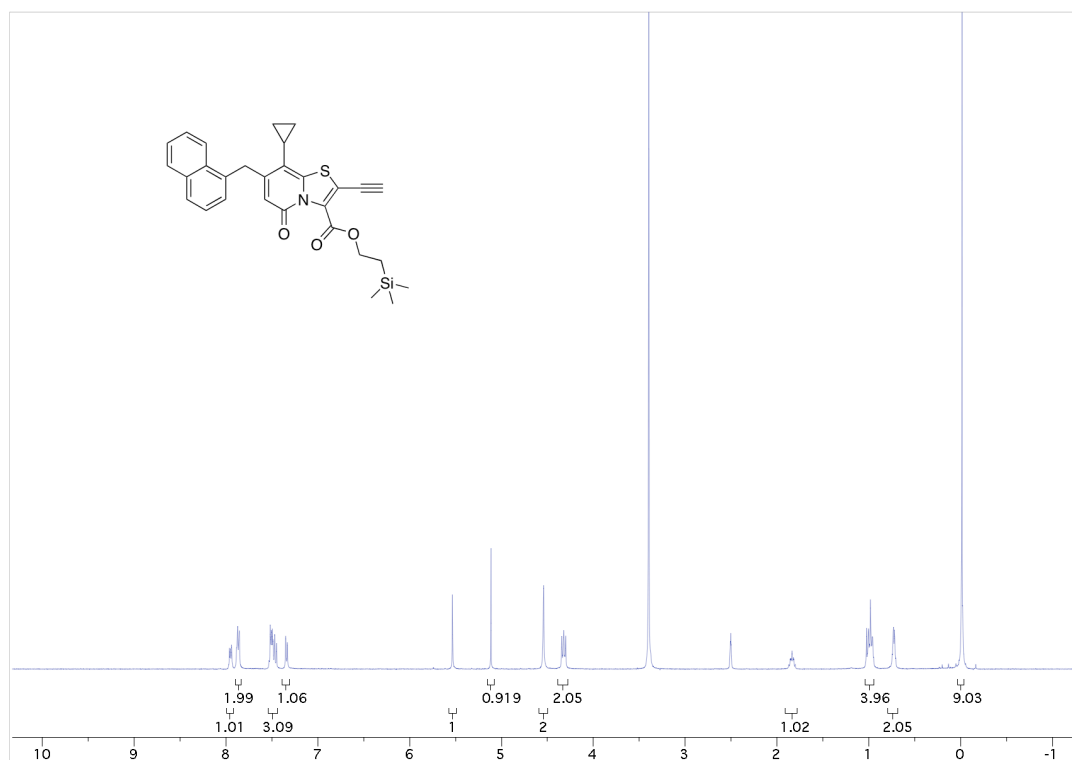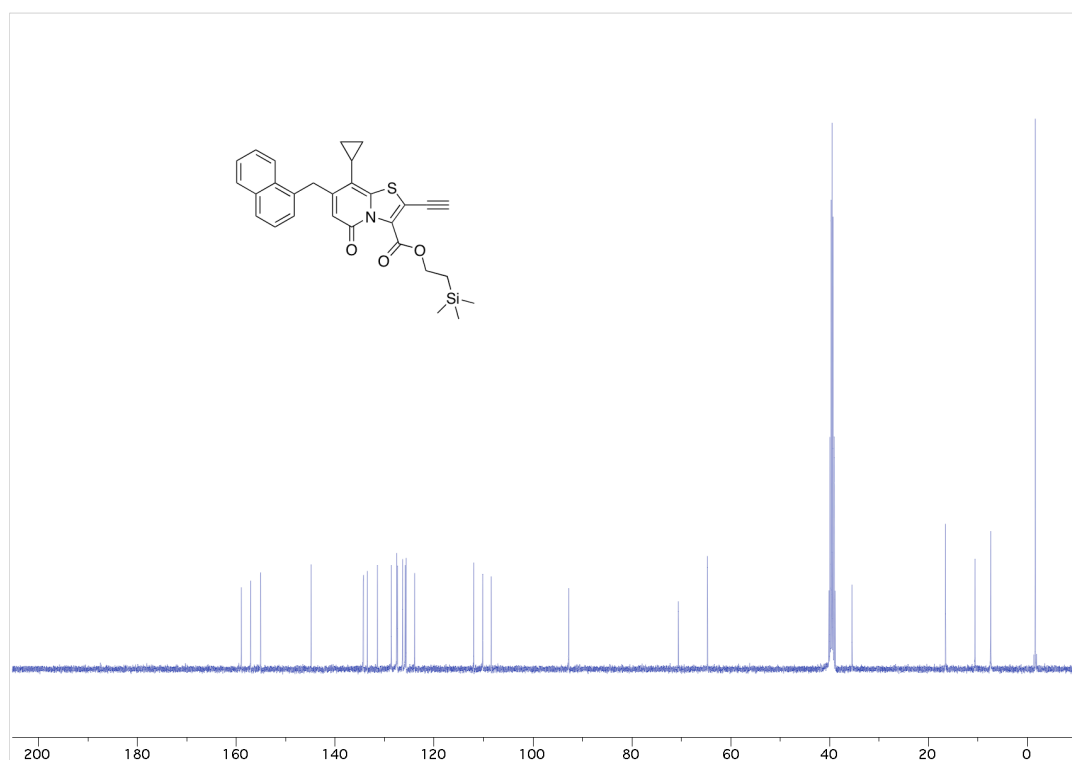

Compound **20** in d6-DMSO

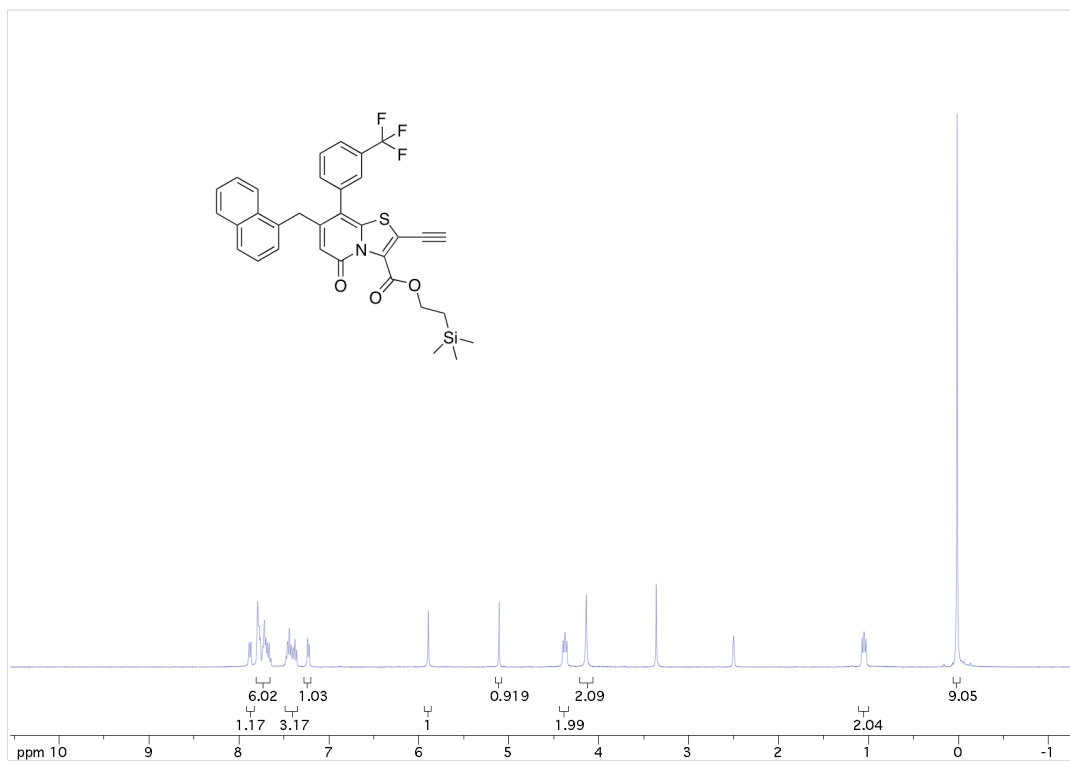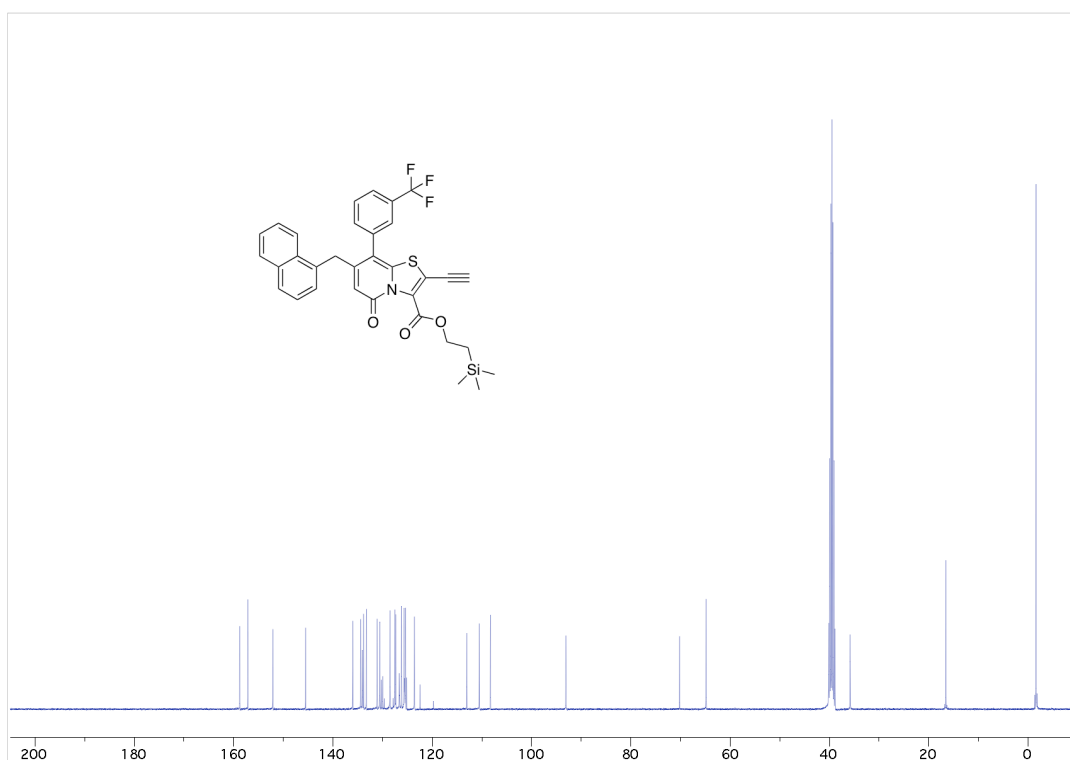

# Compound **21** in d6-DMSO

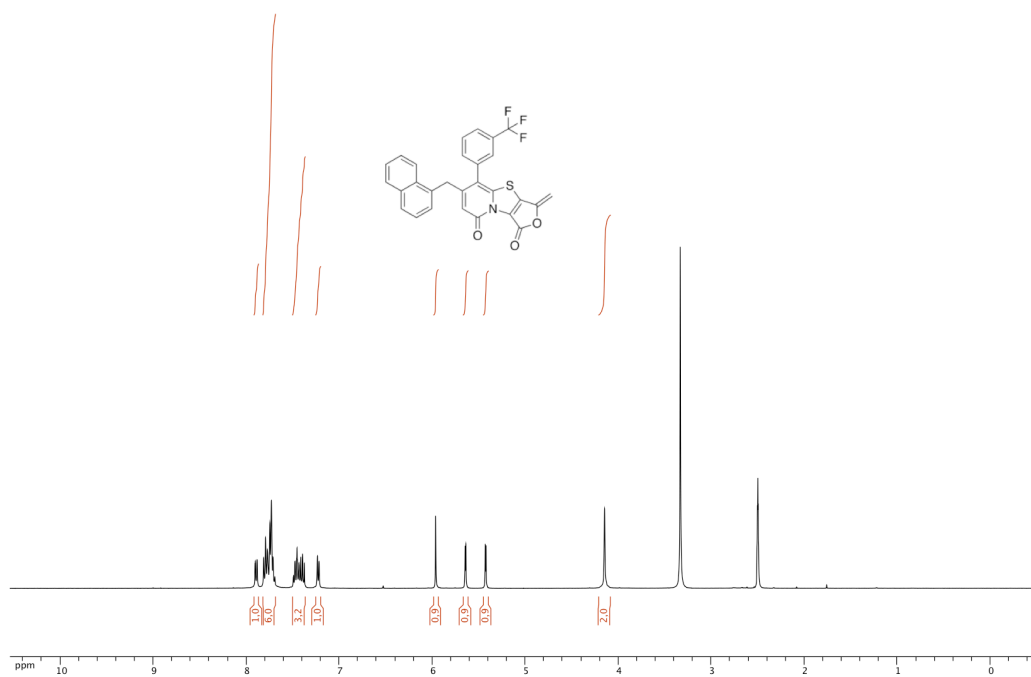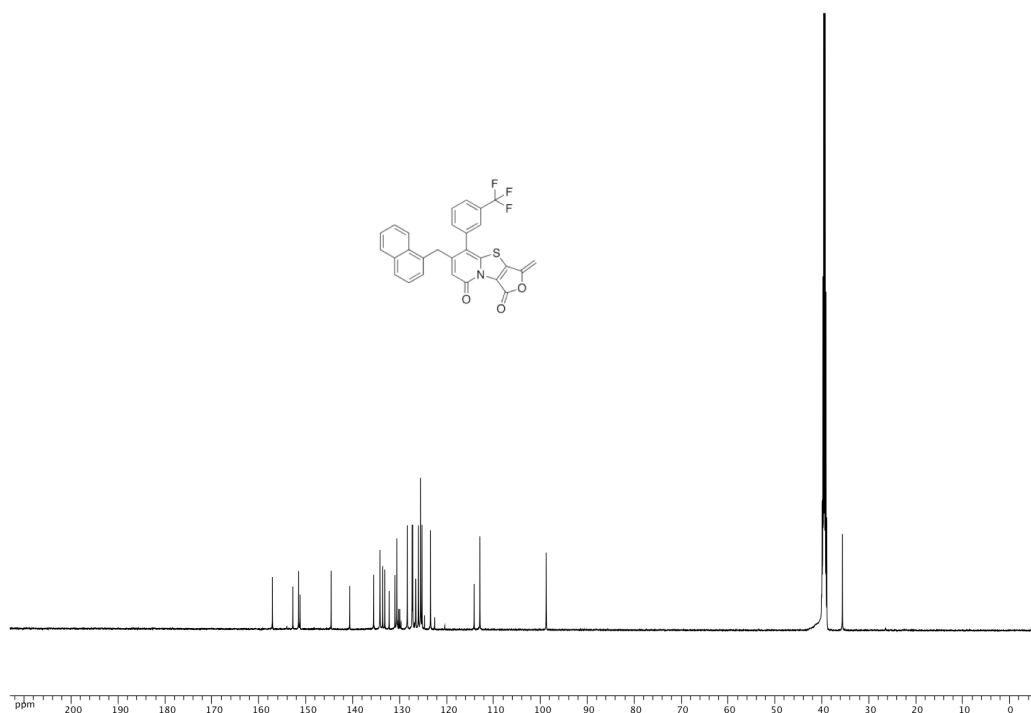



Compound **23a** in CDCl<sub>3</sub>

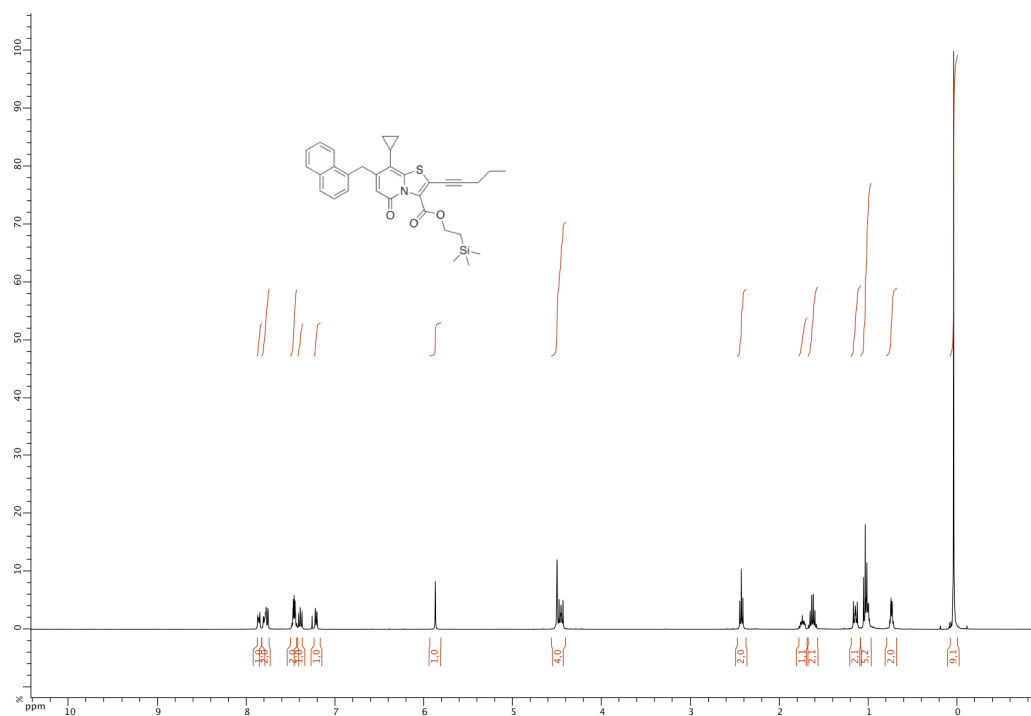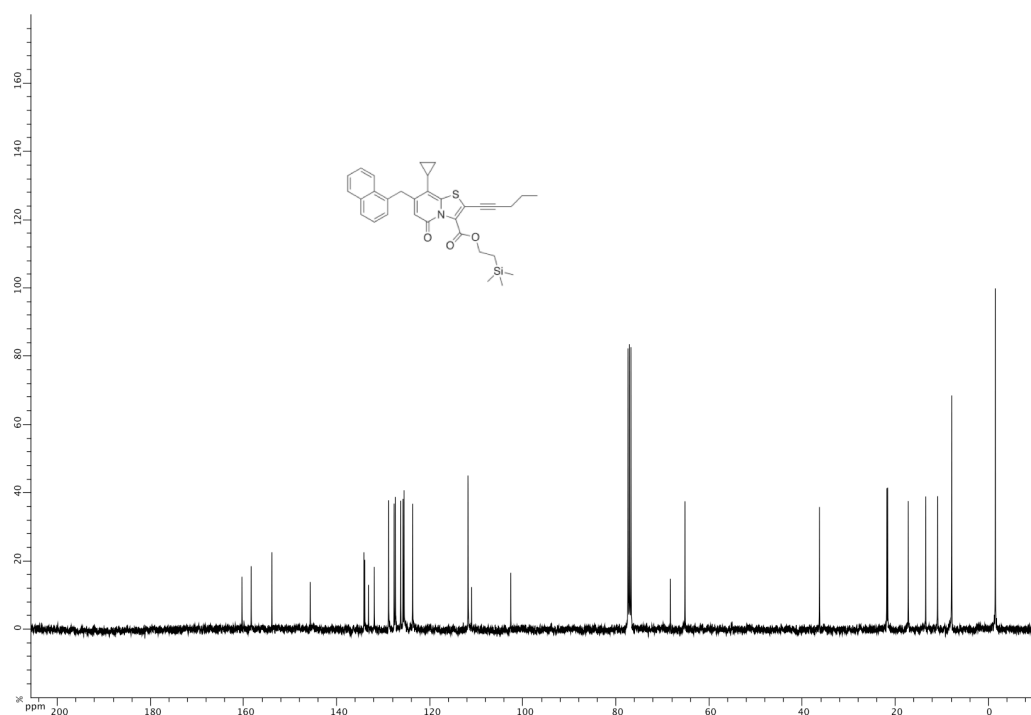

Compound **23b** in CDCl<sub>3</sub>

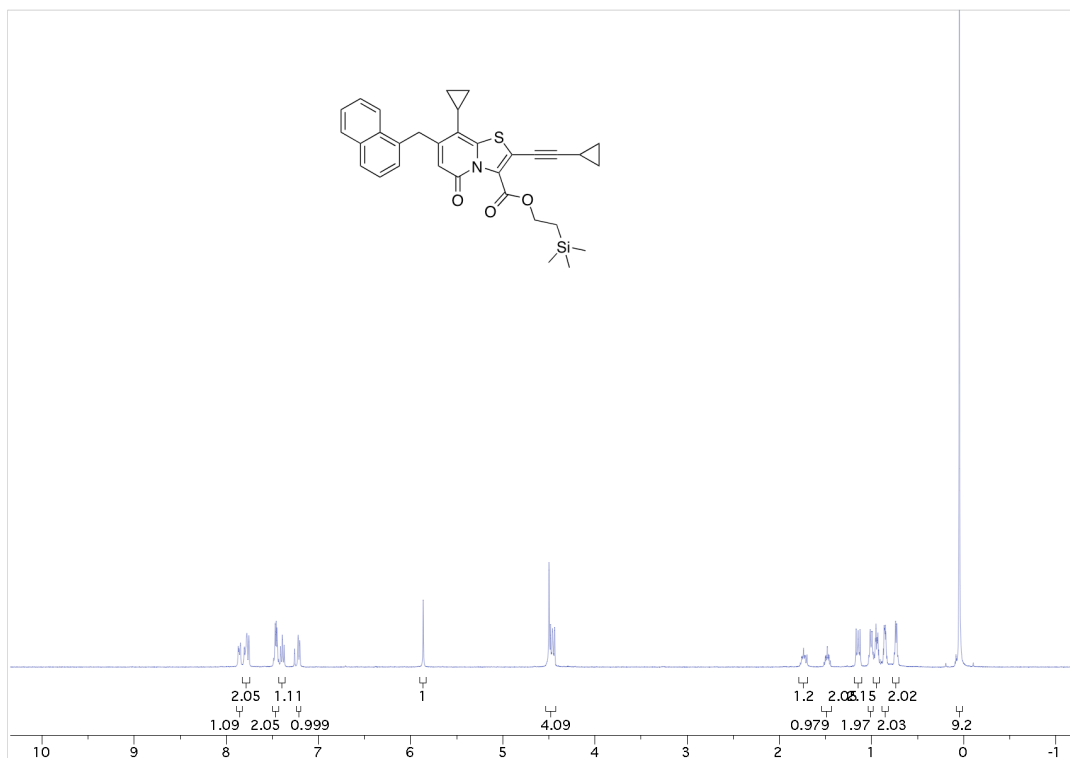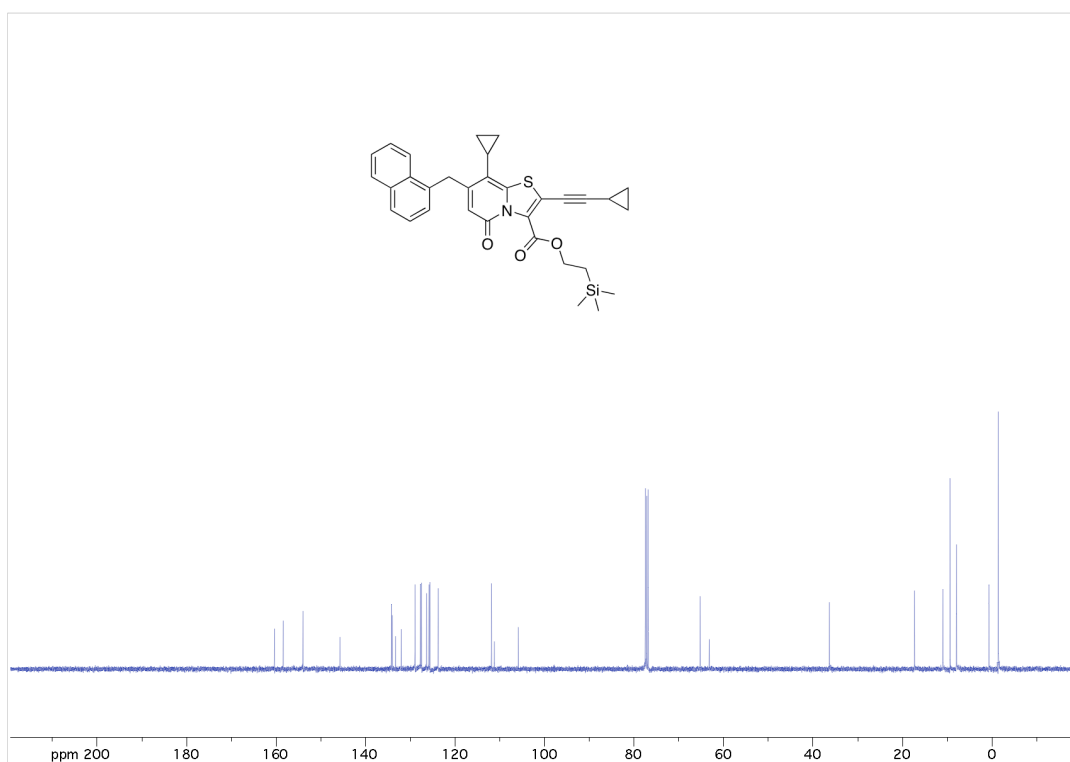

Compound **23c** in CDCl<sub>3</sub>

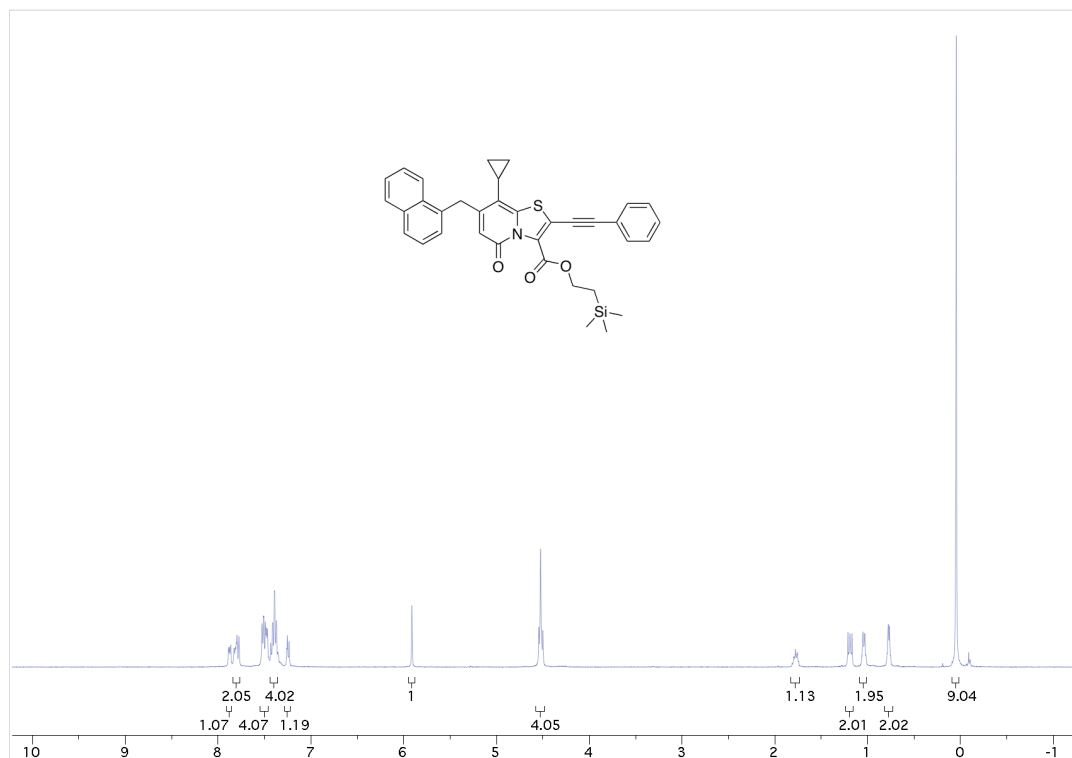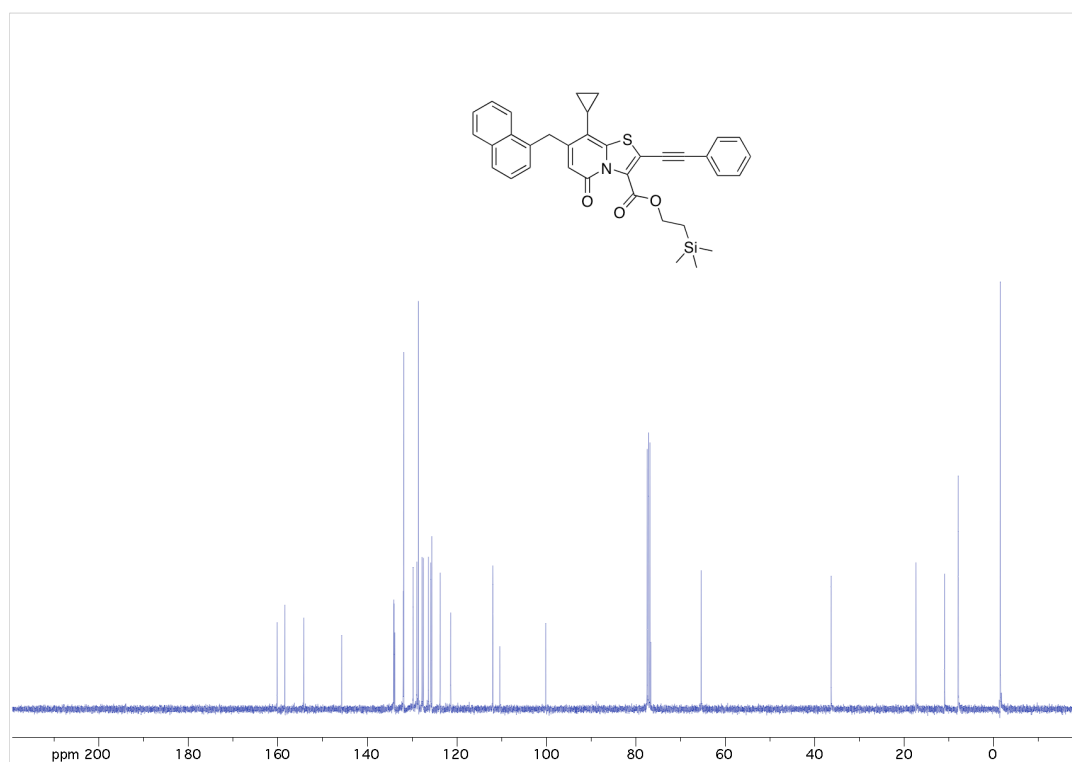

Compound **23d** in d<sub>6</sub>-DMSO

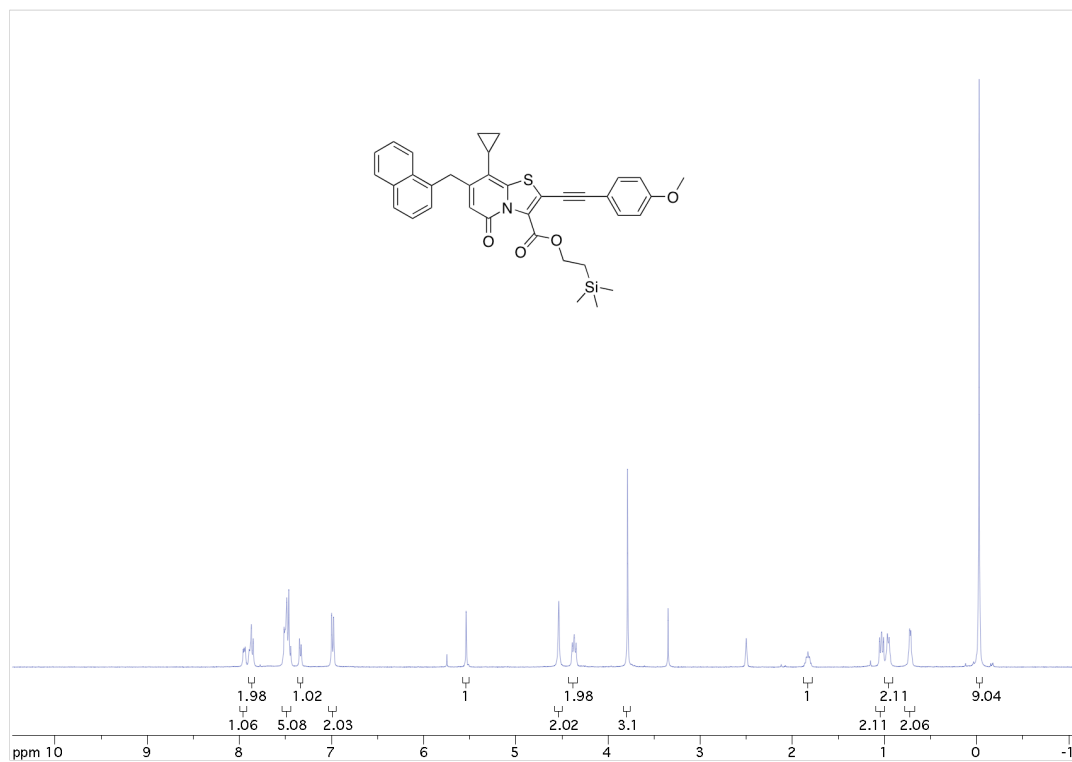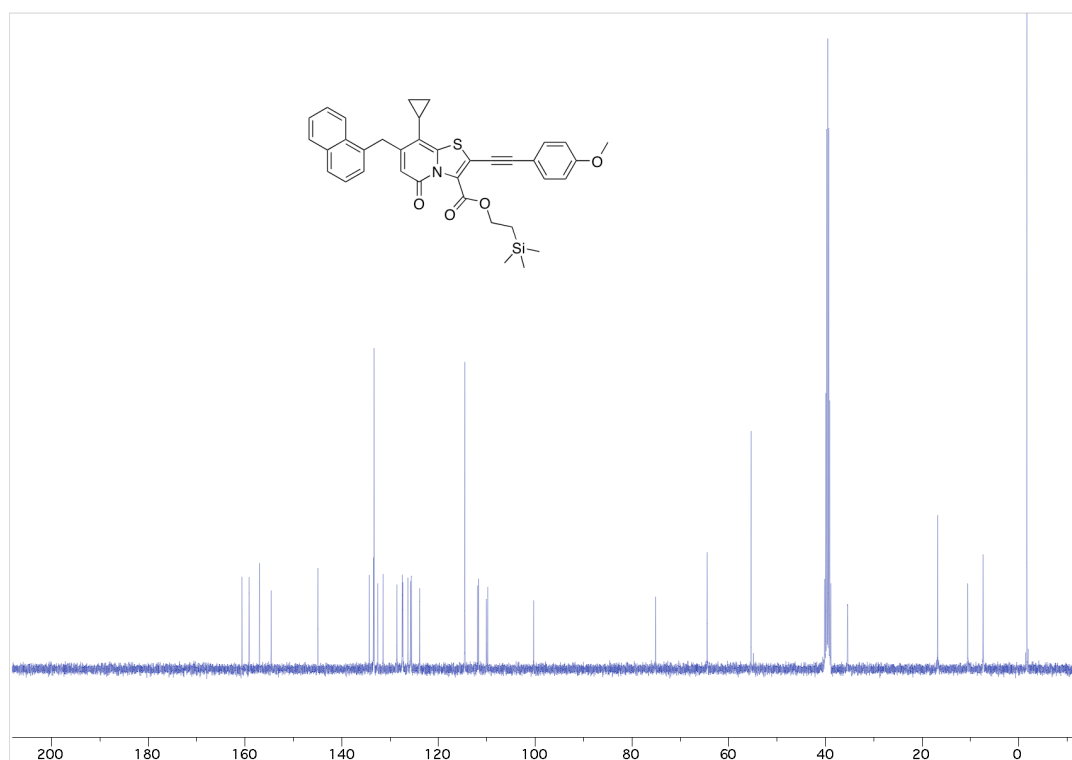



Compound **23e** in CDCl<sub>3</sub>

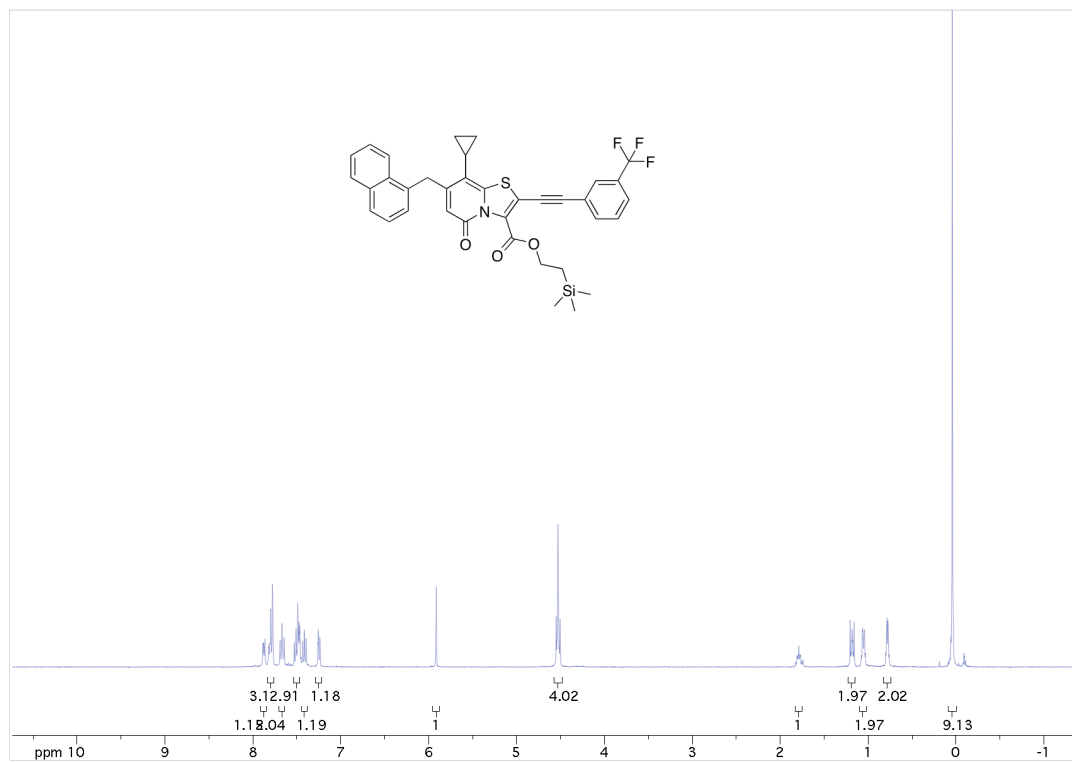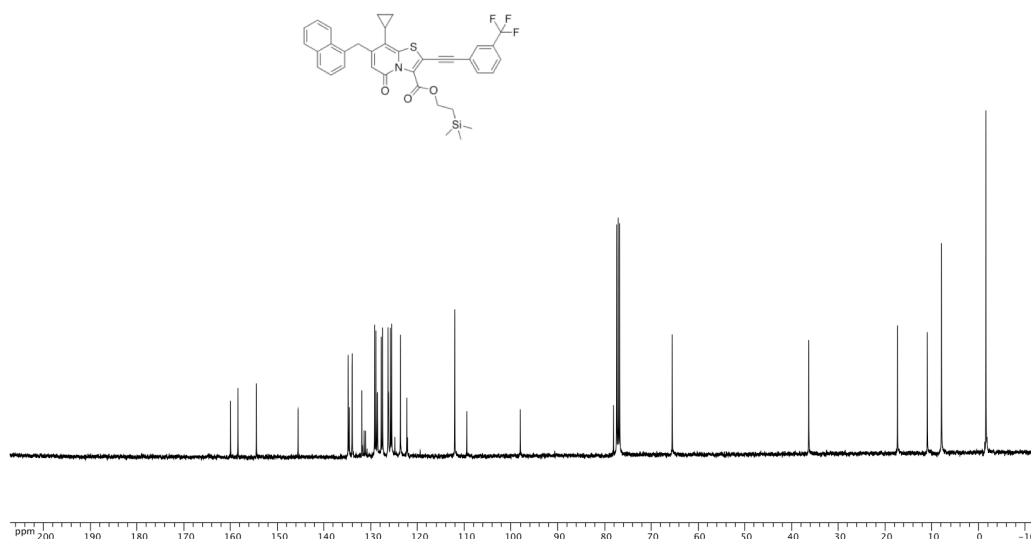



Compound **24a** in CDCl<sub>3</sub>

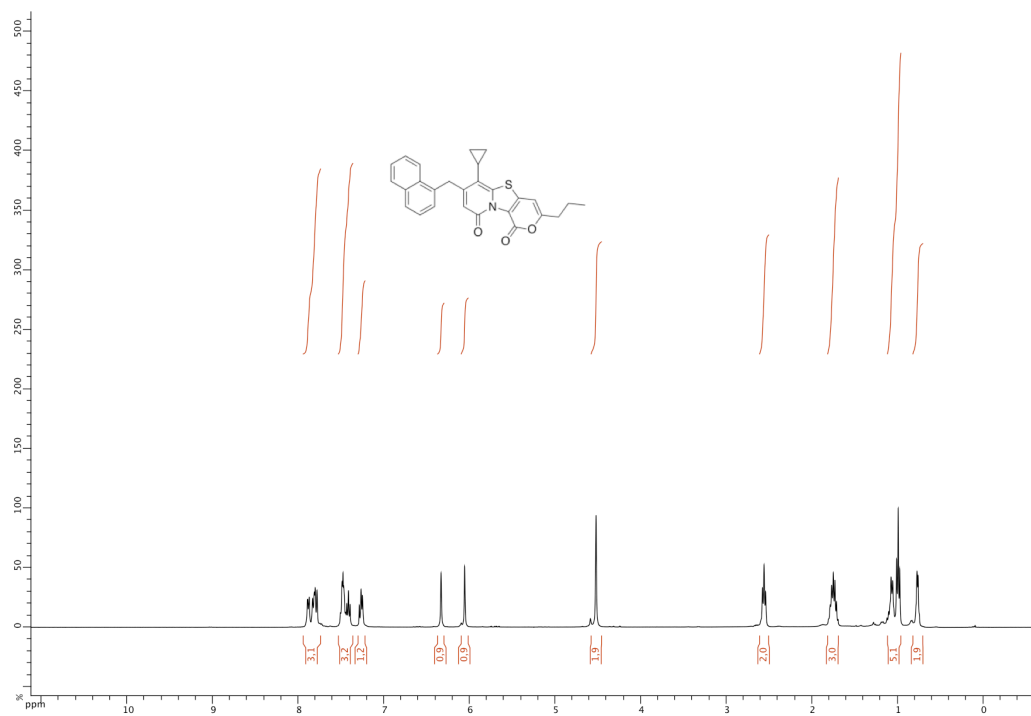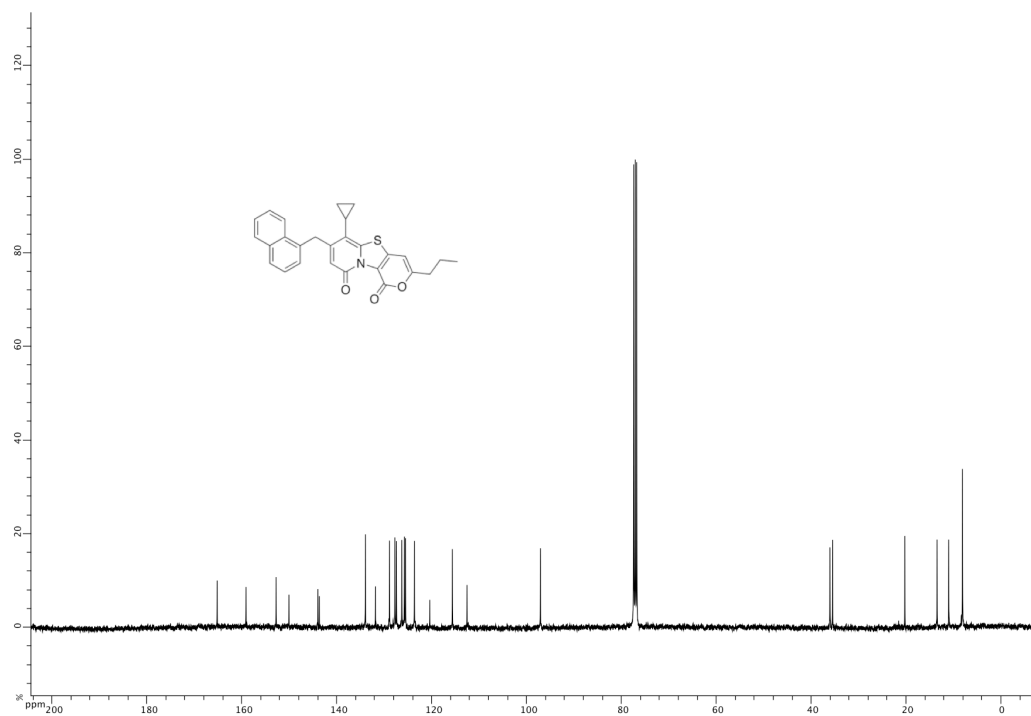

Compound **23b** in CDCl<sub>3</sub>

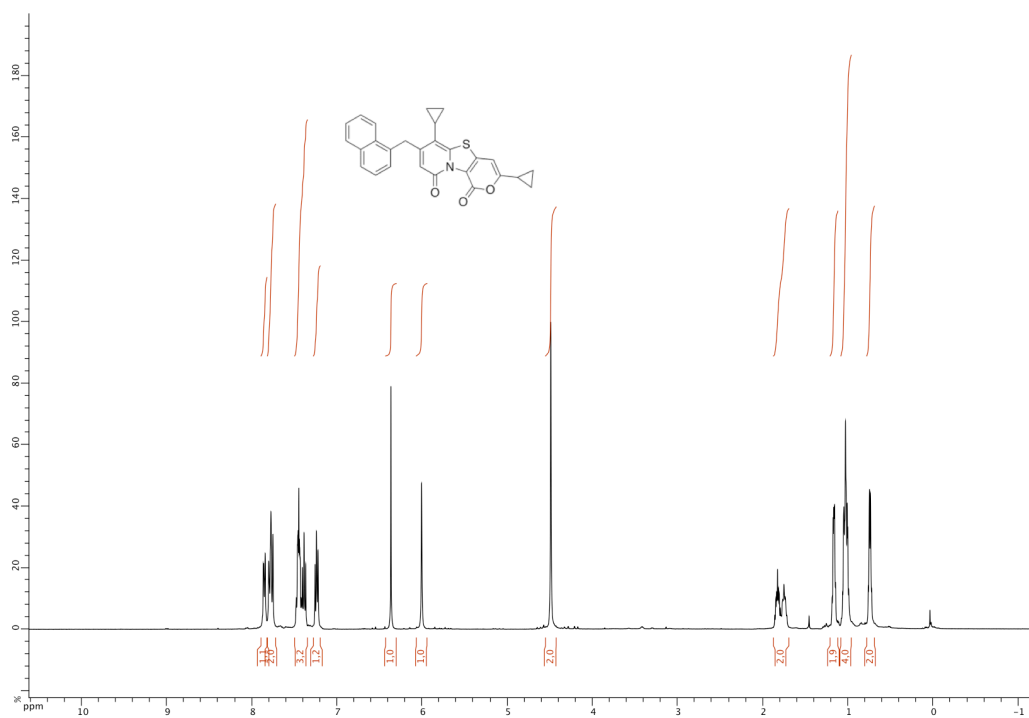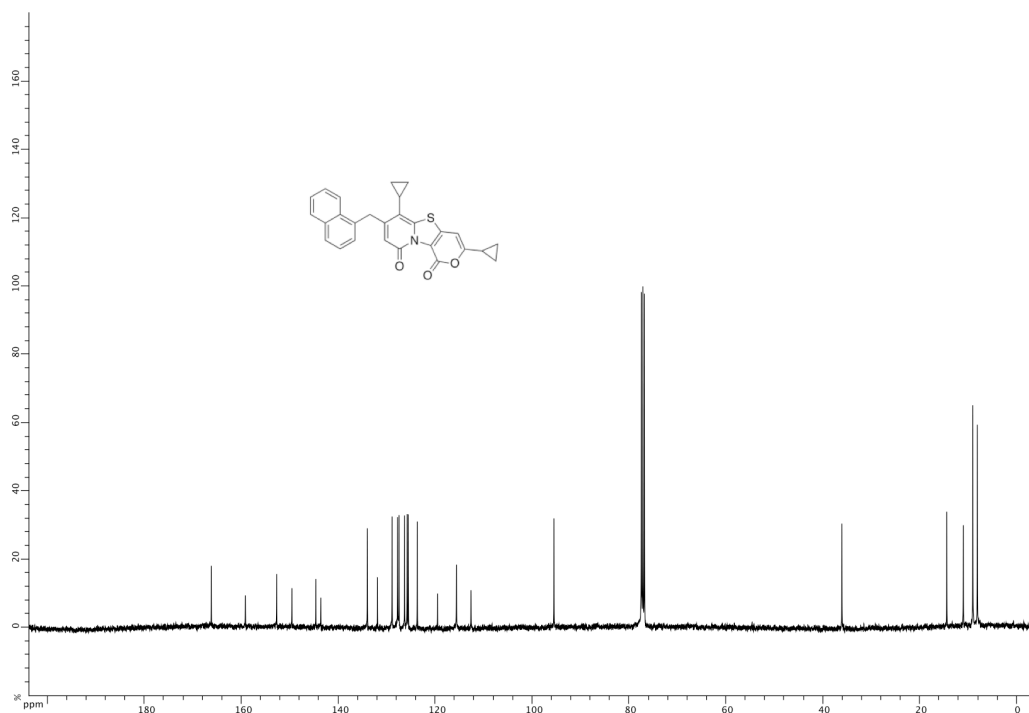

Compound **24c** in CDCl<sub>3</sub>

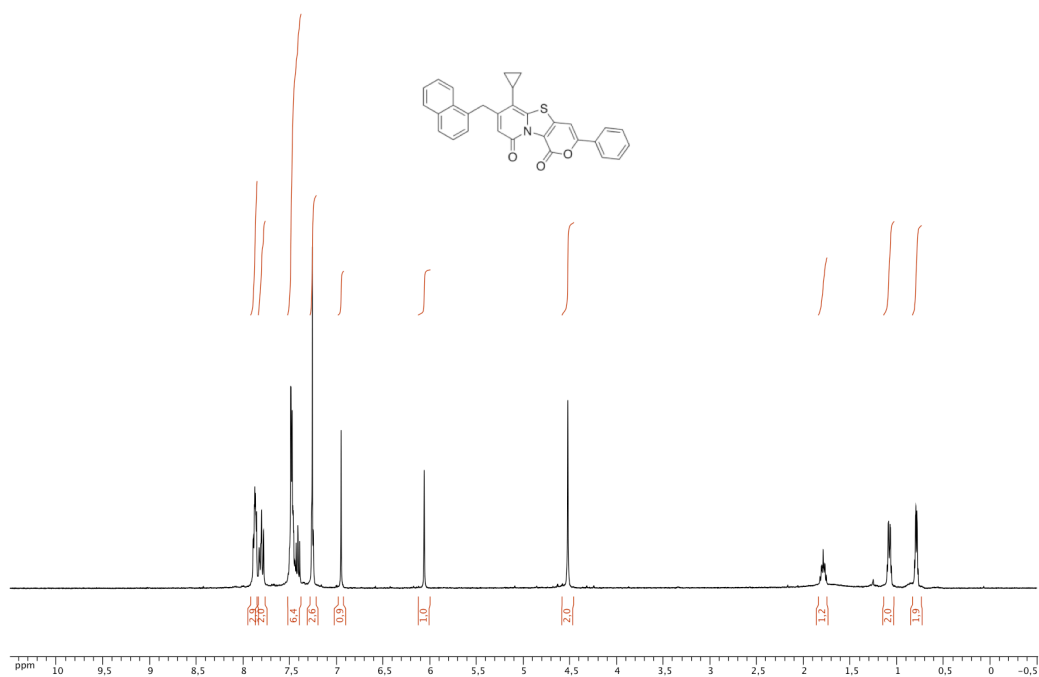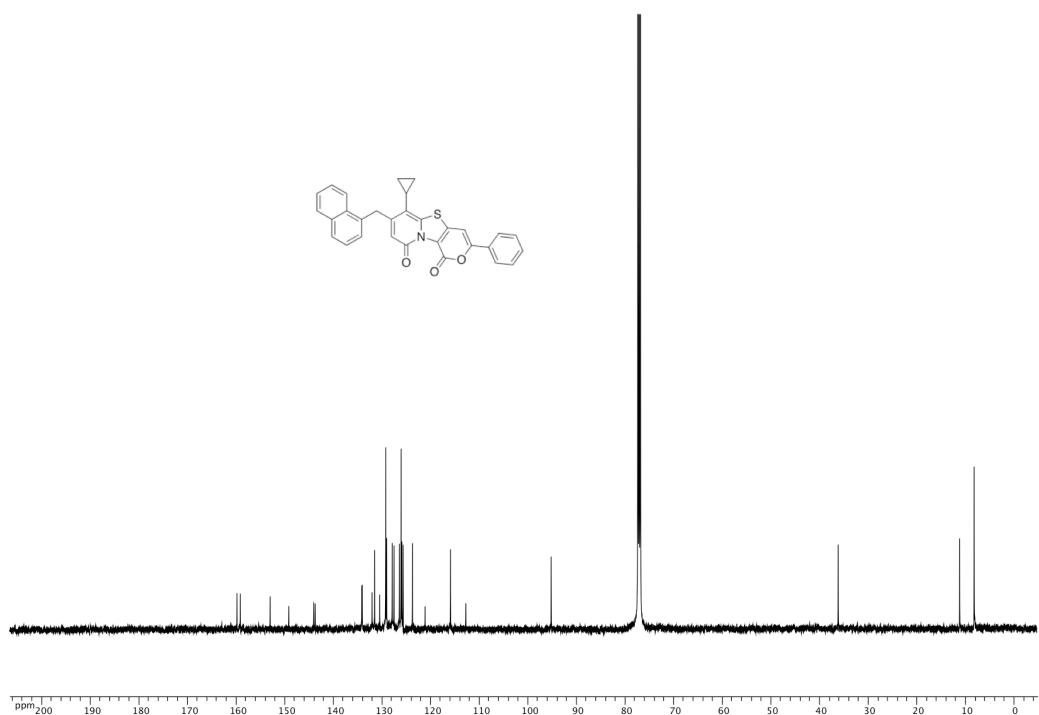

Compound **24d** in CD<sub>2</sub>Cl<sub>2</sub> + 1%TFA

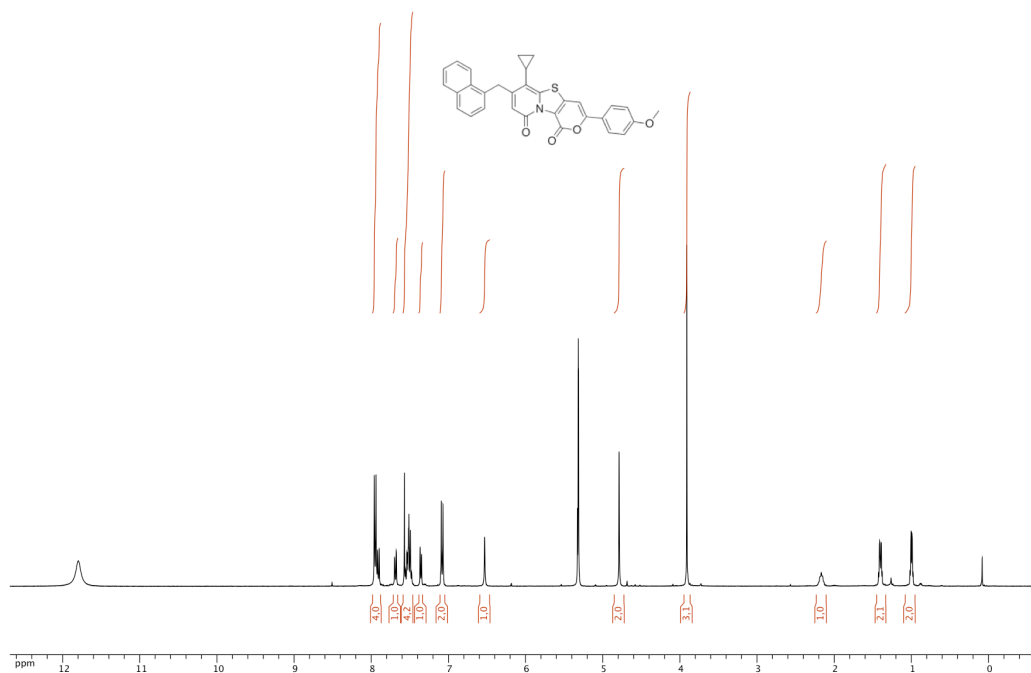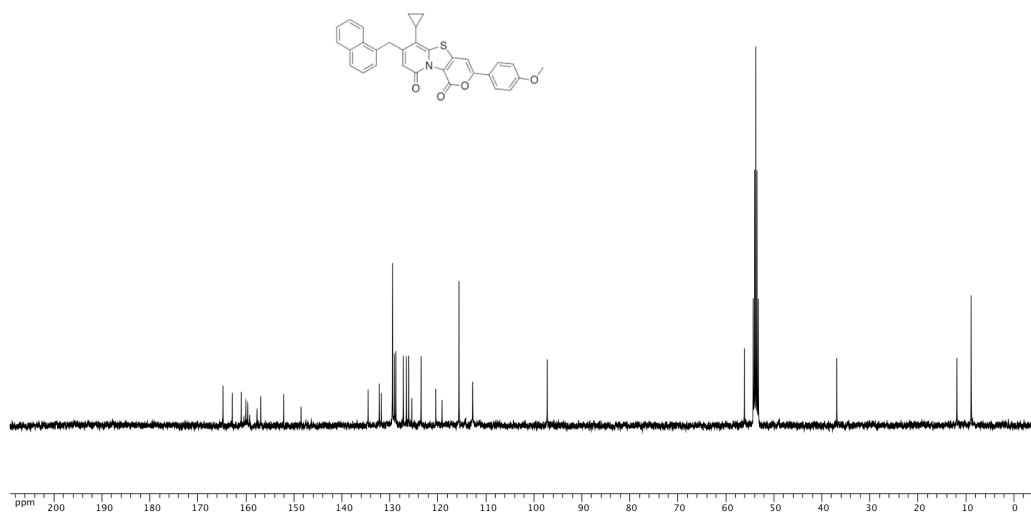

Compound **24e** in CDCl<sub>3</sub>

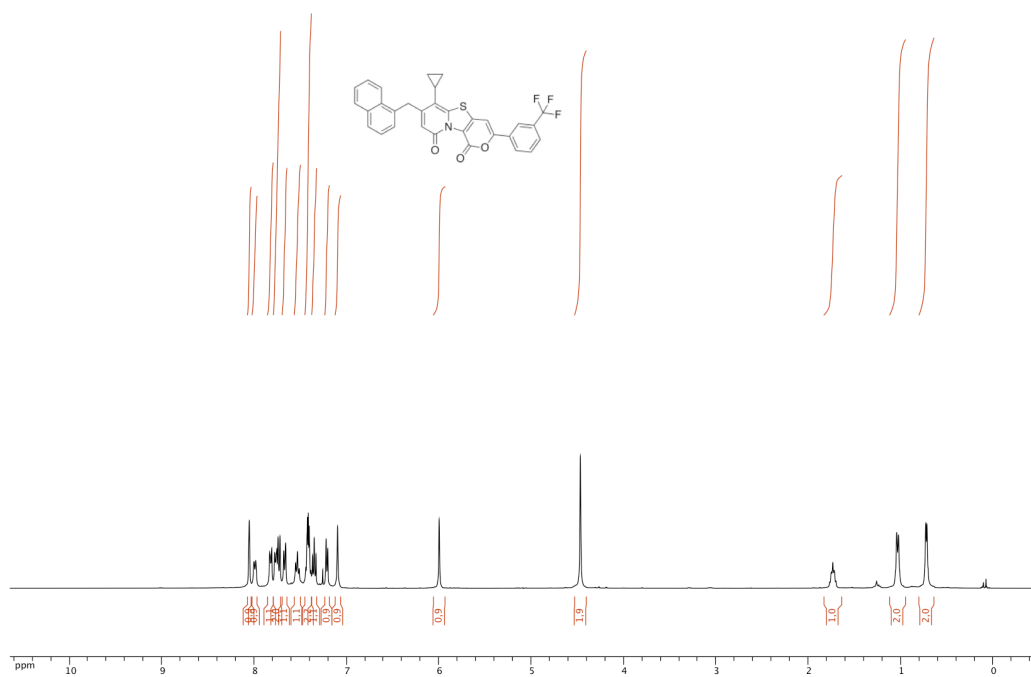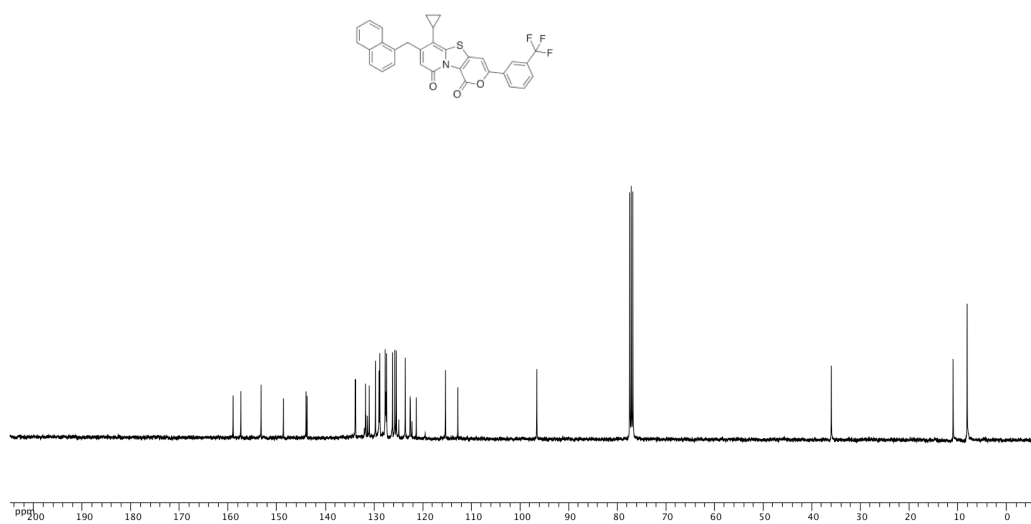

Compound **24f** in CDCl<sub>3</sub>

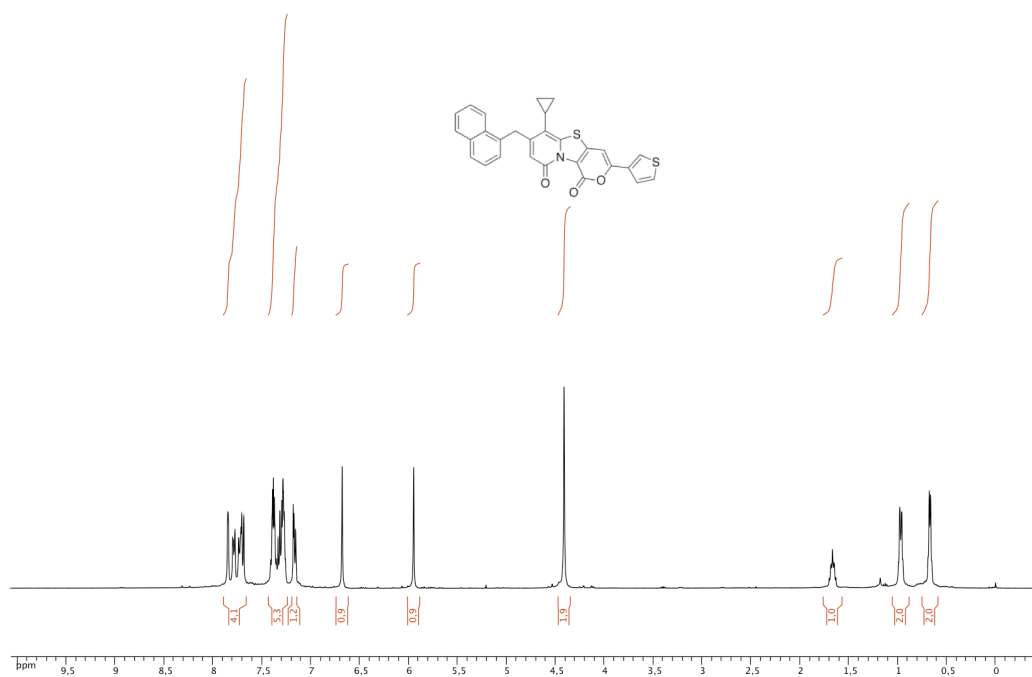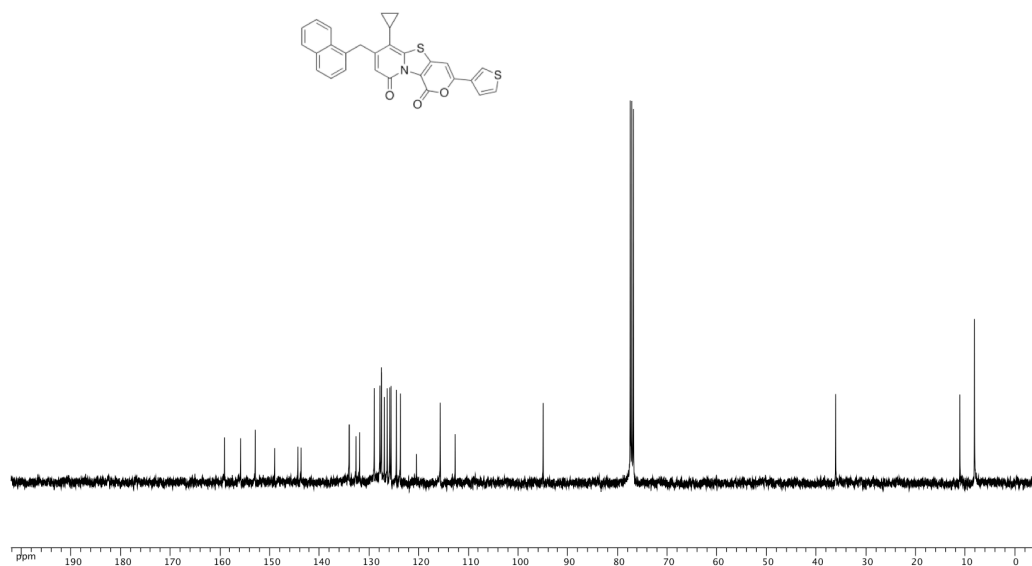



## References

1. Emtenäs H., Taflin C., Almqvist F., *Mol. Diversity*, **2003**, 7, 165-169
2. Chorell E., Pinkner J. S., Phan G., Edvinsson S., Buelens F., Remaut H., Waksman G., Hultgren S. J., Almqvist F., *J. Med. Chem.*, **2010**, 53, 5690-5695
3. Åberg V., Norman F., Chorell E., Westermark A., Olofsson A., Sauer-Eriksson A. E., Almqvist F., *Org. Biomol. Chem.*, **2005**, 3, 2817-2823
